# Supplementary figures and images for: α1-Adrenergic receptor–PKC–Pyk2–Src signaling boosts L-type Ca2+ channel CaV1.2 activity and long-term potentiation in rodents
Source: eLife journal article supplement (doi:10.7554/elife.79648), 2023-06-20

Figure 3-figure supplement 1

A

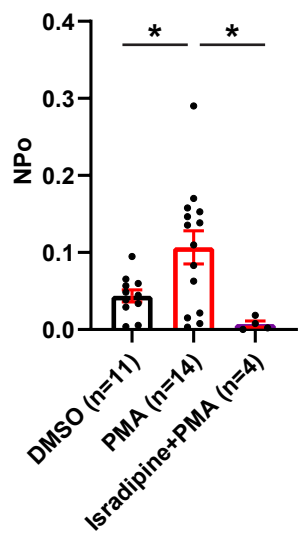

Supplement: supp [file elife-79648-supp-v1.zip]

Figure 2-figure supplement 1

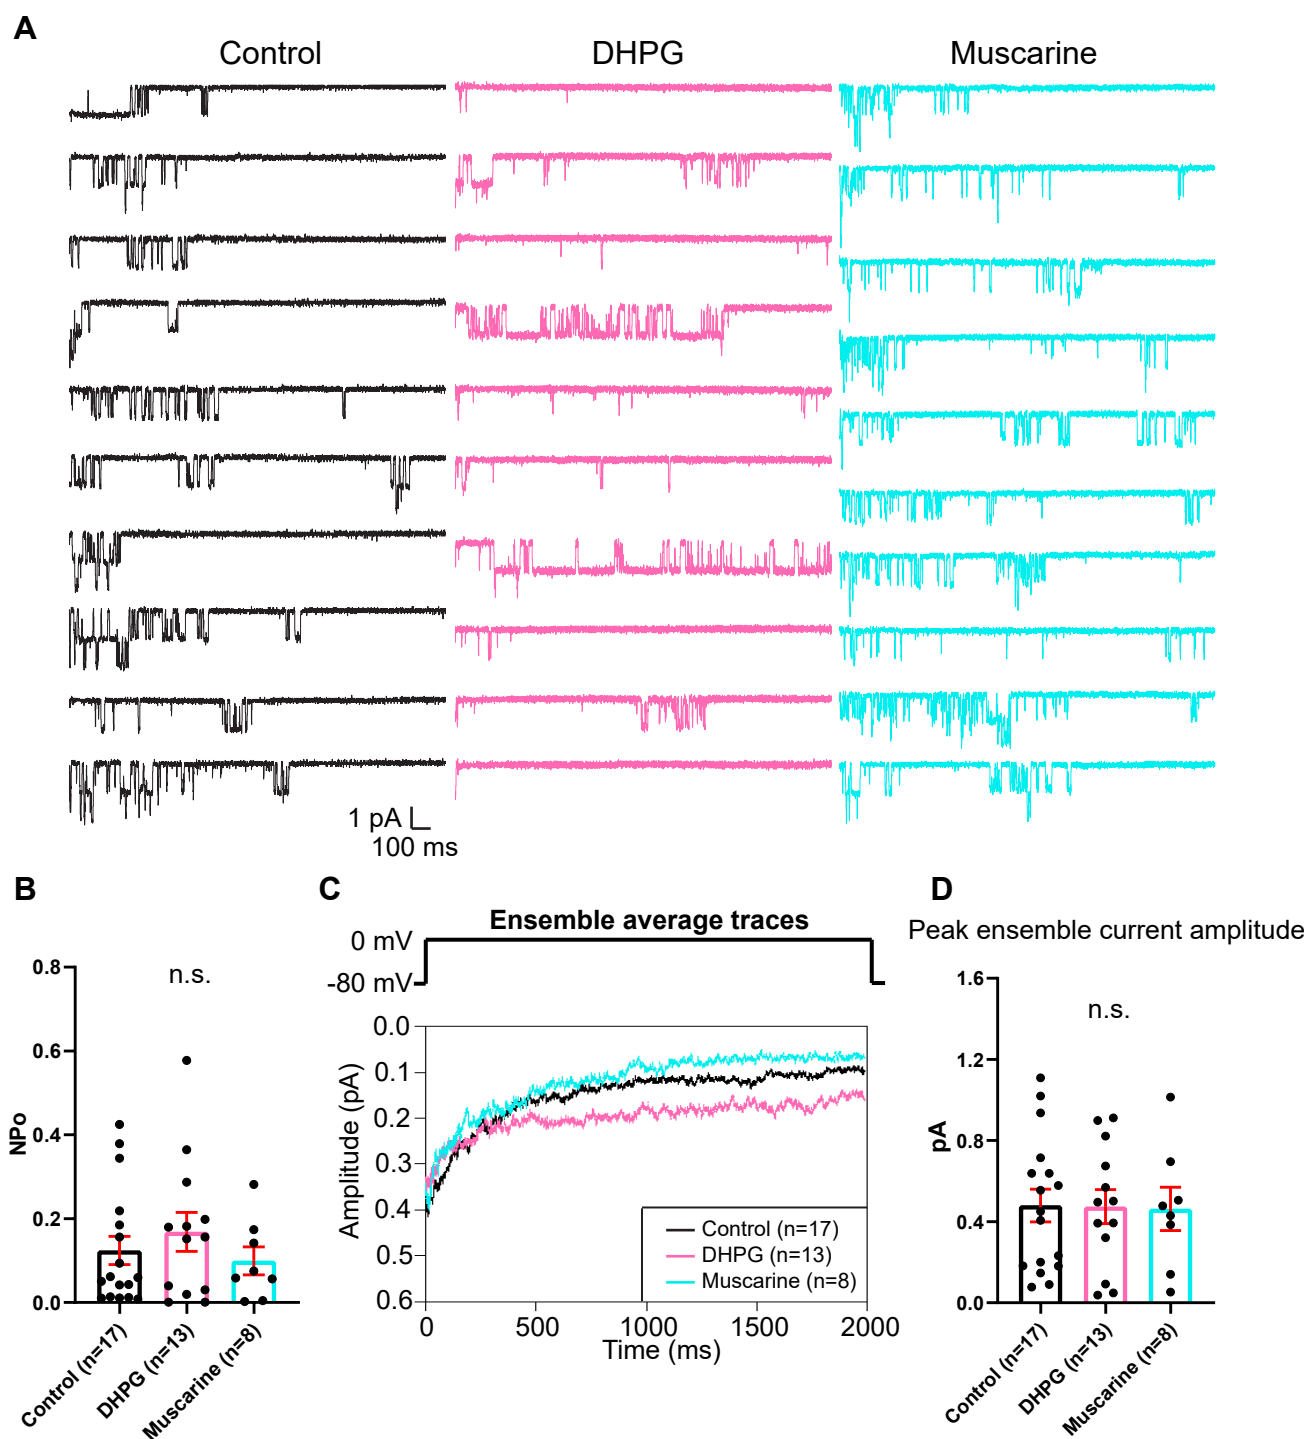

Supplement: supp [file elife-79648-supp-v1.zip]
